# Supplementary material for: Robust Superhydrophobic Cellulose Nanofiber Aerogel for Multifunctional Environmental Applications
Source: MDPI journal article supplement (doi:10.3390/polym11030495), 2019-03-14
Supplement: s1 [file s1]

## Supporting Information

### (SI1)

The van Oss and Good approach to determine the SFE splits the total SFE ( $\gamma_s^{\text{TOT}}$ ) in the dispersive Lifshitz–van der Waals interactions ( $\gamma_s^{\text{LW}}$ ) and the polar Lewis acid–base interactions ( $\gamma_s^{\text{AB}}$ ) as shown in Equation SI1.1. The acid base interactions are further divided into electron donor ( $\gamma_s^-$ ) and electron acceptor ( $\gamma_s^+$ ) parts (Equation SI1.2):<sup>1</sup>

$$\gamma_s^{\text{TOT}} = \gamma_s^{\text{LW}} + \gamma_s^{\text{AB}}, \quad (\text{SI1.1})$$

$$\gamma_s^{\text{AB}} = 2 \cdot \left( \sqrt{\gamma_s^+ \gamma_s^-} \right). \quad (\text{SI1.2})$$

The  $\gamma_s^+$  characterises the tendency of a surface to interact with liquids that are electron donors, while the  $\gamma_s^-$  characterises its tendency to interact with liquids that are electron acceptors.<sup>2</sup> Further, the work of adhesion  $W_{\text{ad}}$  can be related to the measured contact angles ( $\theta$ ) by taking Young's equation into account:<sup>3</sup>

$$W_{\text{ad}} = (1 + \cos \theta) \gamma_1^{\text{TOT}} = 2 \left( \sqrt{\gamma_s^{\text{LW}} \gamma_1^{\text{LW}}} + \sqrt{\gamma_s^+ \gamma_1^-} + \sqrt{\gamma_s^- \gamma_1^+} \right), \quad (\text{SI1.3})$$

Where  $\gamma_1^{\text{TOT}}$  is the total surface tension of the liquid,  $\gamma_s^{\text{LW}}$  and  $\gamma_1^{\text{LW}}$  are the dispersive Lifshitz–van der Waals parts of the liquid and the solid, respectively, and  $\gamma_s^+ \gamma_1^-$  and  $\gamma_s^- \gamma_1^+$  are the acid–base contributions of either the solid or the liquid phase. To resolve the equation one must use at least three test liquids with known  $\gamma_1^{\text{TOT}}$ ,  $\gamma_1^{\text{LW}}$ ,  $\gamma_1^-$ , and  $\gamma_1^+$ .<sup>3</sup> Young's equation can be applied for ideal surfaces, which are flat, inert, and chemically homogeneous, but doesn't estimate the energy of a surface which is not ideal. The SFE calculations in this work were carried out for an ideal surface.

Table S1.1:  $\gamma_1^{\text{TOT}}$ ,  $\gamma_1^{\text{LW}}$ ,  $\gamma_1^+$ ,  $\gamma_1^-$  values for water, ethylene glycol, formamide, and diiodomethane as chosen in this work.

| Liquid          | $\gamma_1^{\text{TOT}}$ | $\gamma_1^{\text{LW}}$ | $\gamma_1^+$ | $\gamma_1^-$ | Author          |
|-----------------|-------------------------|------------------------|--------------|--------------|-----------------|
| Water           | 72.8                    | 21.8                   | 25.5         | 25.5         | Erbil           |
| Ethylene glycol | 48.0                    | 29.0                   | 3.0          | 30.1         | Van OSs         |
| Formamide       | 58.0                    | 39.0                   | 2.28         | 39.6         | Van Oss         |
| Diiodomethane   | 50.8                    | 50.8                   | 0.7          | 0.0          | González-Martin |

## Compression experiments

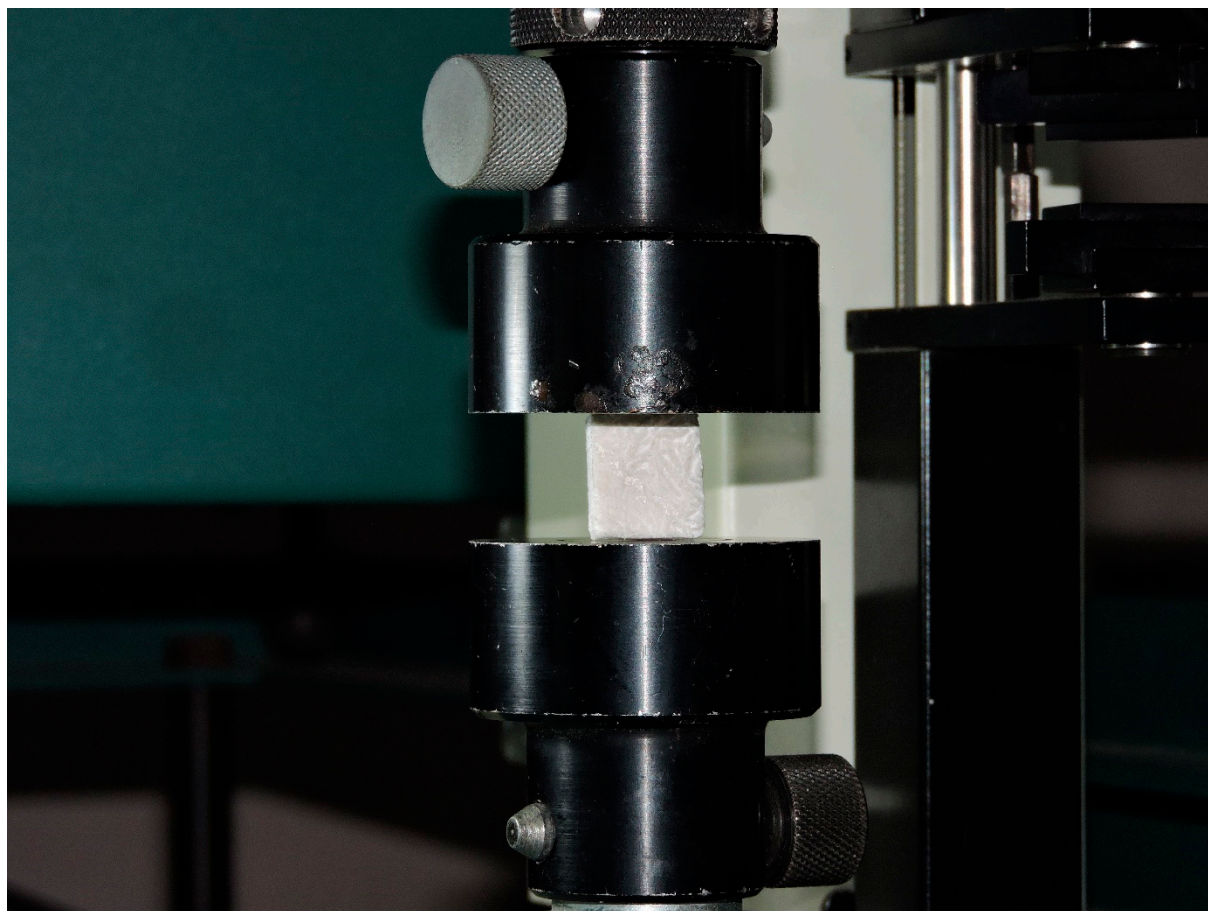

**Figure S1:** Experimental set-up for compression tests.

## References

1. Mohan, T. *et al.* Wettability and surface composition of partly and fully regenerated cellulose thin films from trimethylsilyl cellulose. *J. Colloid Interface Sci.* **358**, 604–610 (2011).
2. Peršin, Z., Stenius, P. & Stana-Kleinschek, K. Estimation of the surface energy of chemically and oxygen plasma-treated regenerated cellulosic fabrics using various calculation models. *Text. Res. J.* **81**, 1673–1685 (2011).
3. Mohan, T. *et al.* Cationically rendered biopolymer surfaces for high protein affinity support matrices. *Chem. Commun.* **49**, 11530 (2013).
